# Supplementary material for: Peripubertal Nutritional Prevention of Cancer-Associated Gene Expression and Phenotypes
Source: MDPI journal article supplement (doi:10.3390/cancers15030674), 2023-01-21

# Peripubertal Nutritional Prevention of Cancer-Associated Gene Expression and Phenotypes

Andrew Brane, Itika Arora and Trygve O. Tollefsbol

**Table S1.** Primer sequences for RT-qPCR.

|        |                                                   |
|--------|---------------------------------------------------|
| GAPDH  | GTGGAGTCATACTGGAACATGTAG<br>AATGGTGAAGGTCGGTGTG   |
| P53    | TGAAAATGTCTCCTGGCTCAG<br>CTAGCATTGAGGCCCTCATC     |
| P21    | GAAGAGACAACGGCACACT<br>CAGATCCACAGCGATATCCAG      |
| BRCA2  | TGTGTCATCCCTCTCCAGTATC<br>GATGCCTAAACCCAGAAAGAGT  |
| Erich4 | CCCCATCTCCAGTCCCA<br>TCAGGCCCTTATGTCTTCAG         |
| Lman1I | ATCAAAGTAGATCCCGATGCC<br>GAGATGCAGATGAGAGTGACTG   |
| Clec4e | TGAGAGCTGCGATATGTTACG<br>ATCCCACCACACAGAGAGA      |
| Parp6  | GCATACTTCATAATCTGGACAAGG<br>GTAGAGGTGTTTGGCTATCCC |
| Chrdl2 | TCTCAGTTGTCTGTCTTTGC<br>AGTGTGTCCTGTGTAGCTGTA     |
| Pcsk1  | TCACAGTTATCTCCCTGACGA<br>CCCAGAAGGCATTGAATATGG    |
| Slc51b | GCTGCTTCTTTGATTCTGTT<br>GCTTGGTATTTTCGTGCAGA      |

**Table S2.** Antibodies for Western blots (File S1).

|       |                                                     |
|-------|-----------------------------------------------------|
| P53   | Anti-p53 antibody (ab131442)                        |
| P21   | Recombinant Anti-p21 antibody [EPR18021] (ab188224) |
| BRCA2 | Anti-BRCA2 antibody (ab216972)                      |
| ActB  | $\beta$ -Actin (13E5) Rabbit mAb #4970              |

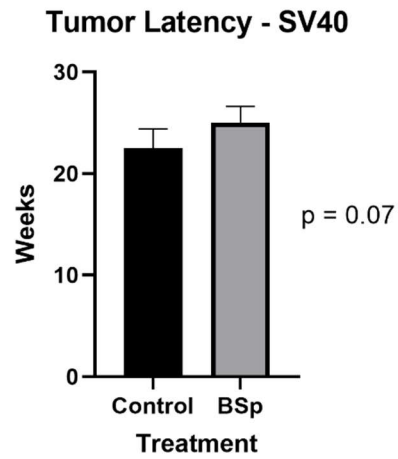

**Figure S1.** Average tumor latency observed in SV40 mice. BSp-treated mice developed tumors approximately 2 weeks later than controls in this mouse model.  $p = 0.07$  and  $n = 24$ .

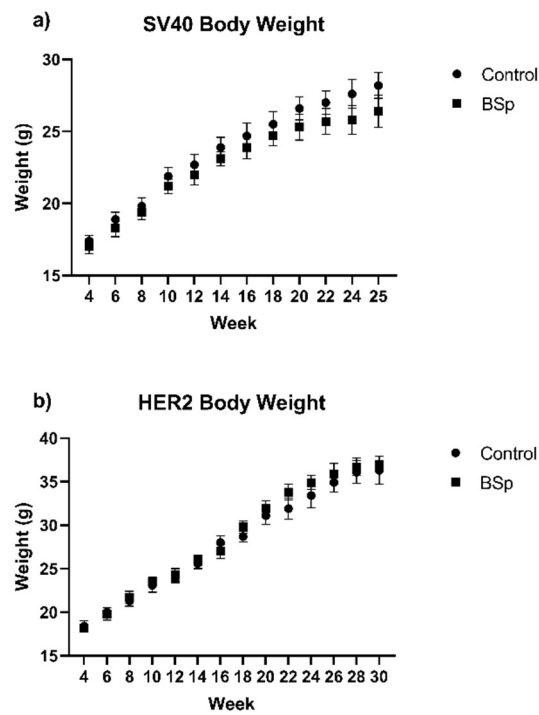

**Figure S2.** Mouse body weight for SV40 (a) and HER2/neu (b) mice. Treatment did not have a significant effect on total body weight in either mouse strain.  $n = 24$  for both strains.

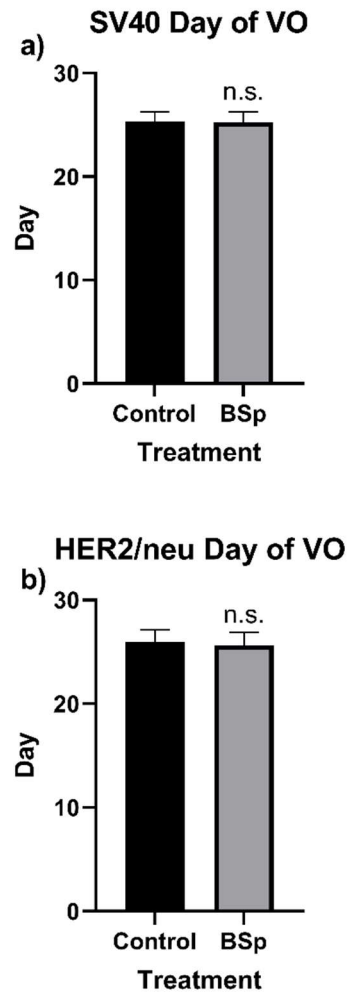

**Figure S3.** Average day of vaginal opening (VO) for SV40 (**a**) and HER2/neu (**b**) mice. Treatment did not have a significant effect on VO in either mouse strain.  $n = 24$  for both strains. n.s., not significant.

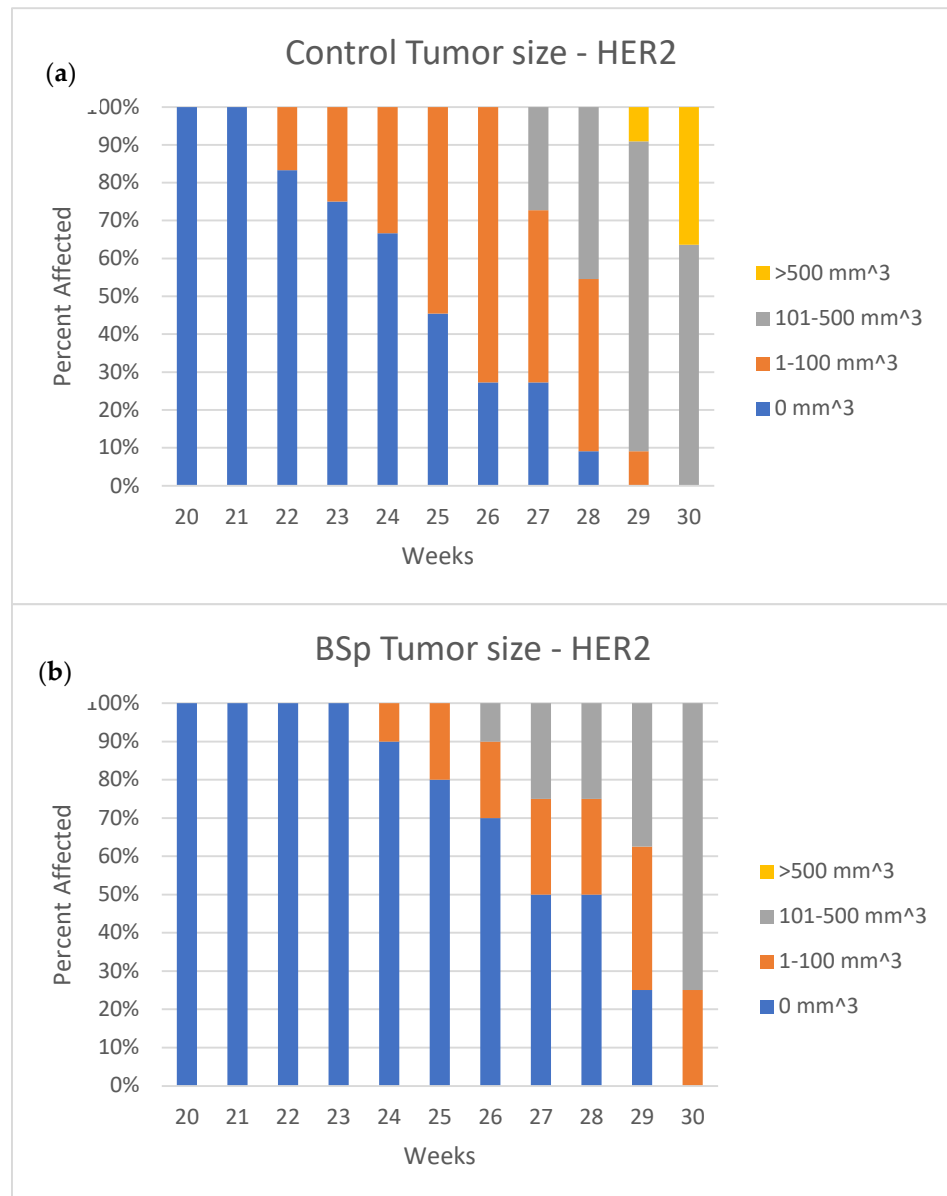

**Figure S4.** Approximate tumor size for HER2/neu mice in both control (a) and BSp (b) fed mice.  $n = 24$  for both groups.

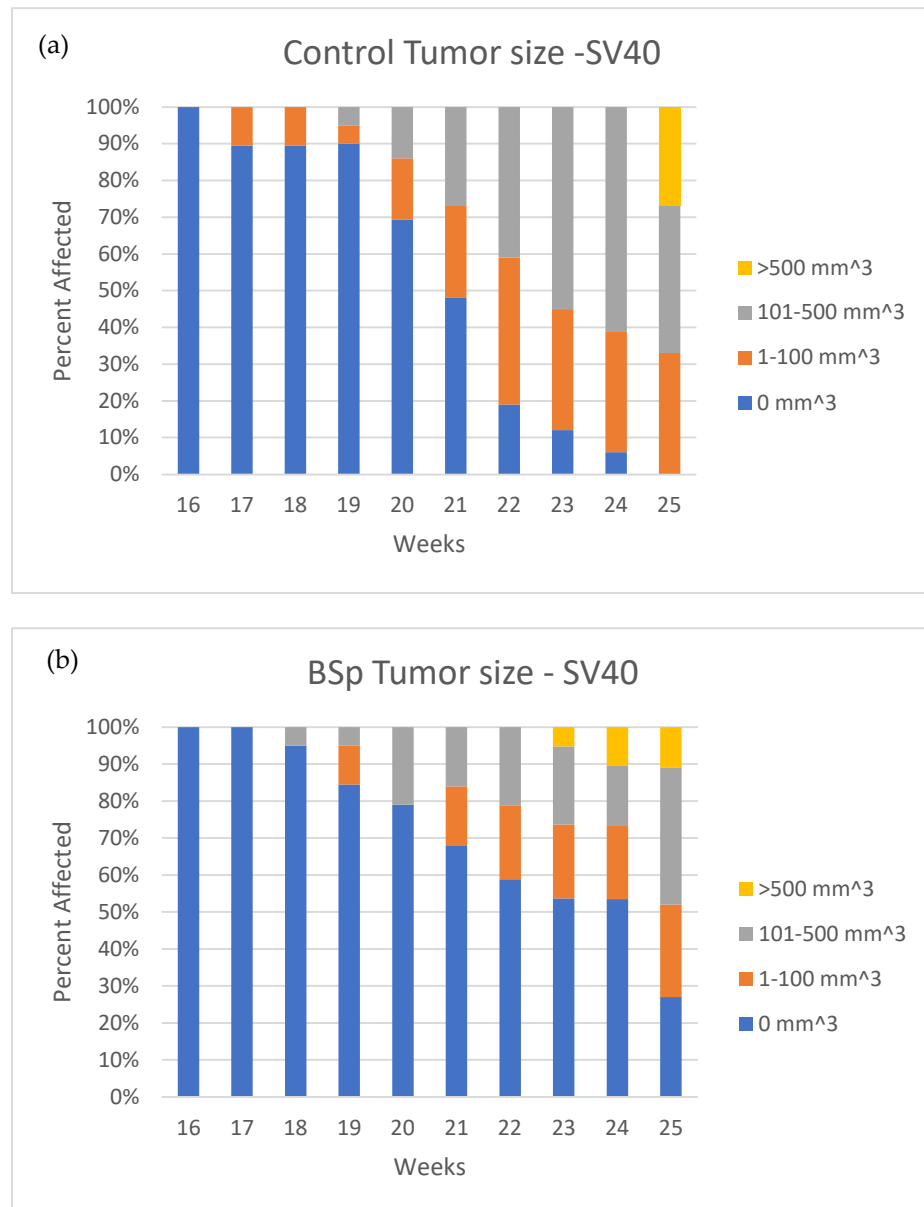

**Figure S5.** Approximate tumor size for SV40 mice in both control (a) and BSp (b) fed mice.  $n = 24$  for both groups.

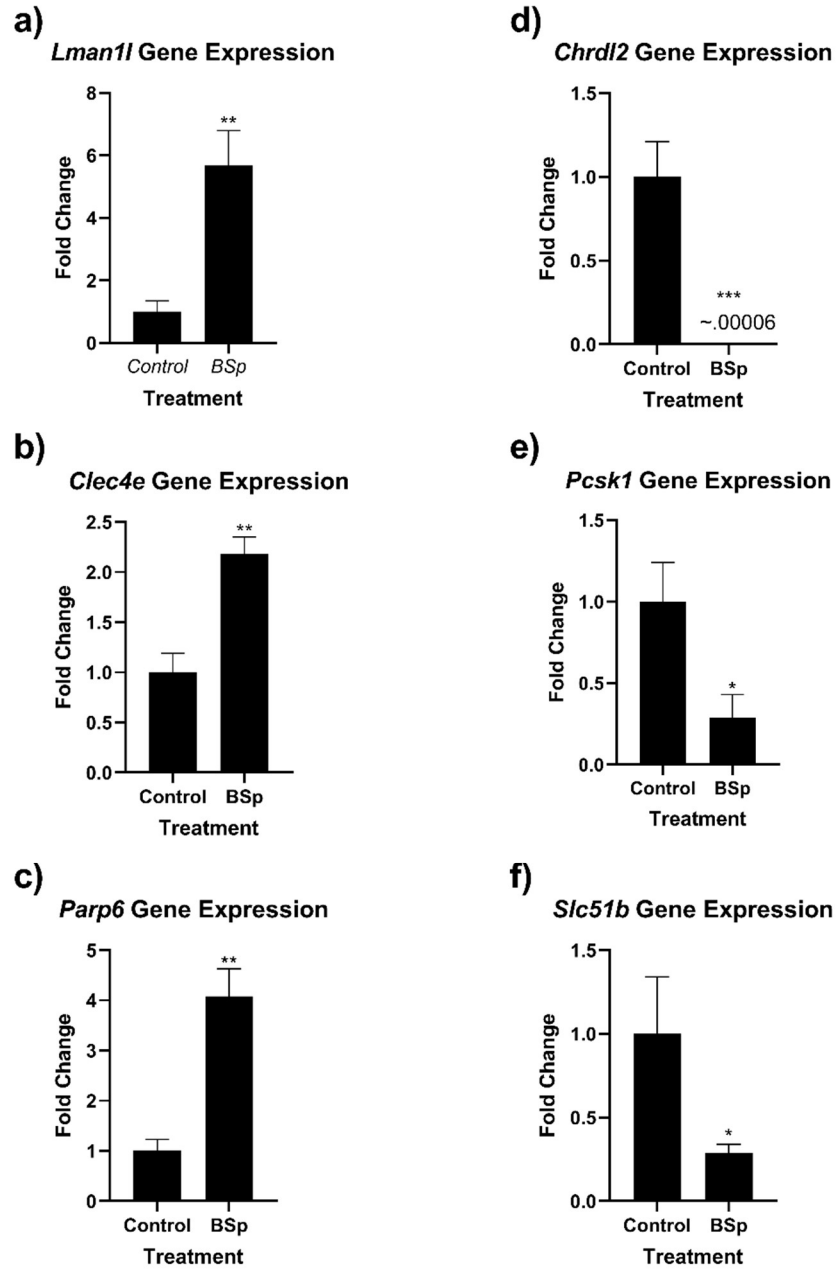

**Figure S6.** PCR verification of tumor suppressors *Lman1l* (a), *Clec4e* (b), *Parp6* (c), as well as oncogenes *Chrdl2* (d), *Pcsk1* (e), and *Slc51b* (f).  $n = 10$  for all RT-qPCR. \* =  $p < 0.05$ , \*\* =  $p < 0.01$ , \*\*\* =  $p < 0.001$ .

a)

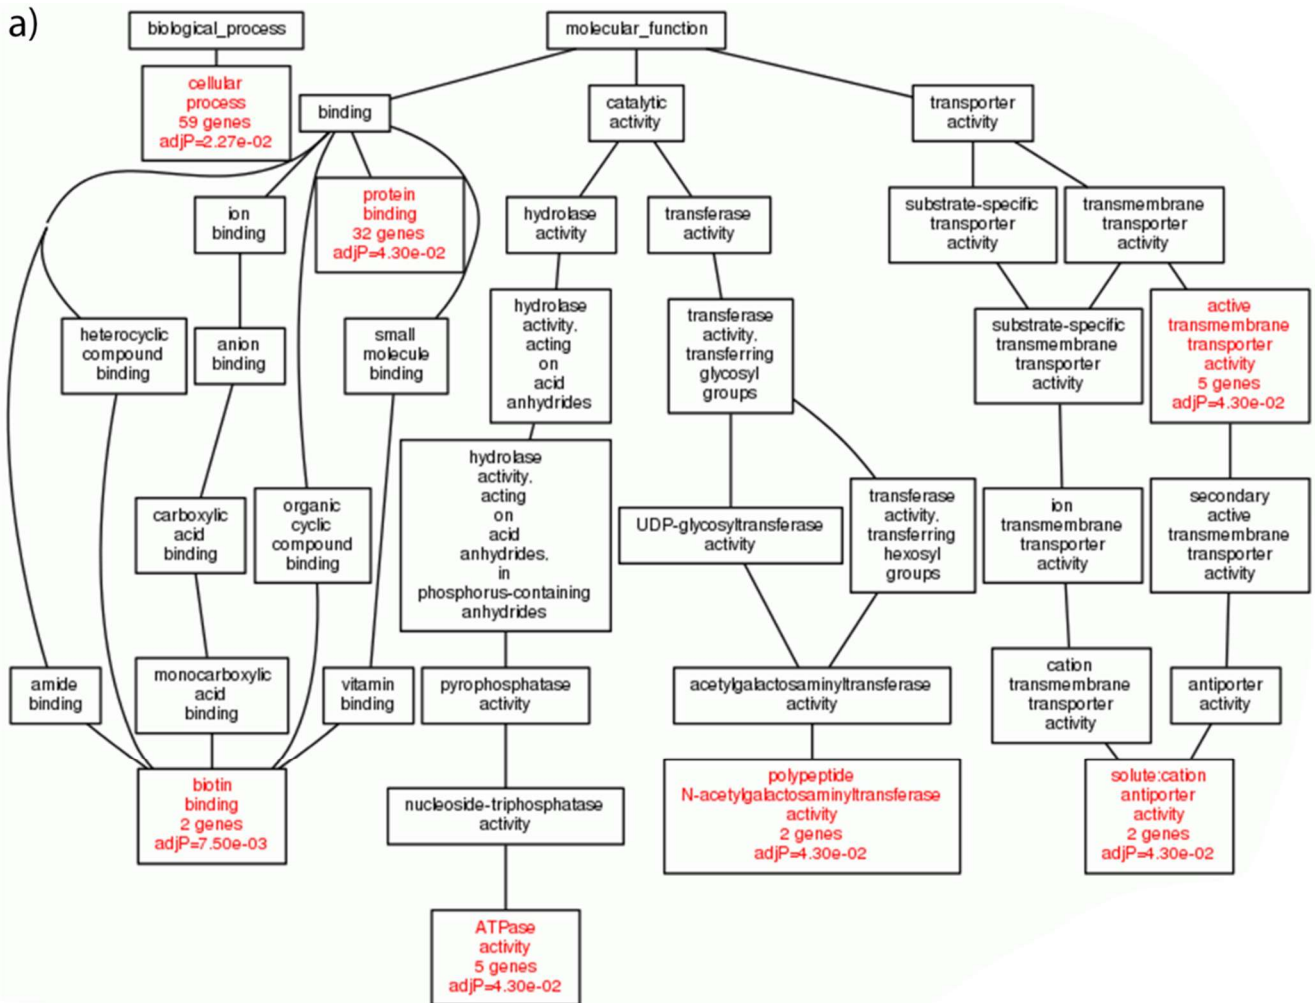

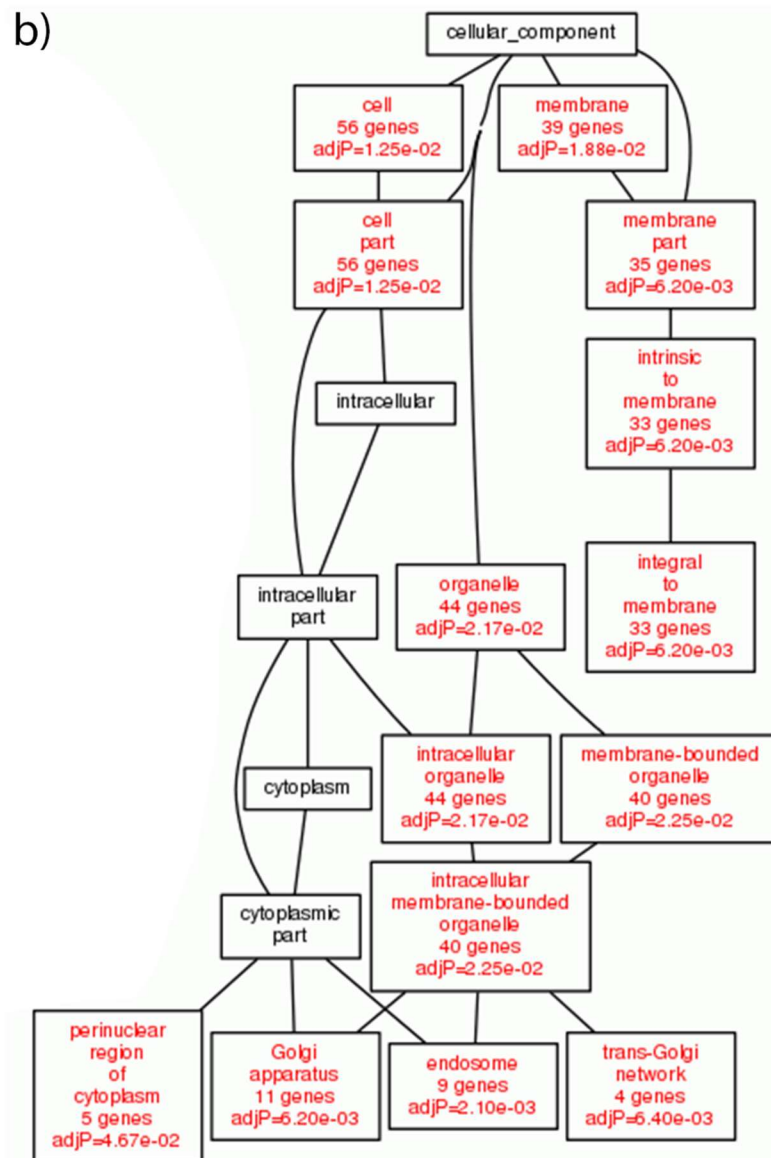

**Figure S7.** Gene ontology analysis for downregulated genes identified by RNA sequencing. Overall, there were 21 significantly upregulated groups of genes within the overarching groups of biological processes (a), molecular function (a), and cellular components (b). Significant groupings of genes are identified in red. P-value cutoff for gene ontology analysis was  $p < 0.05$ .



a)

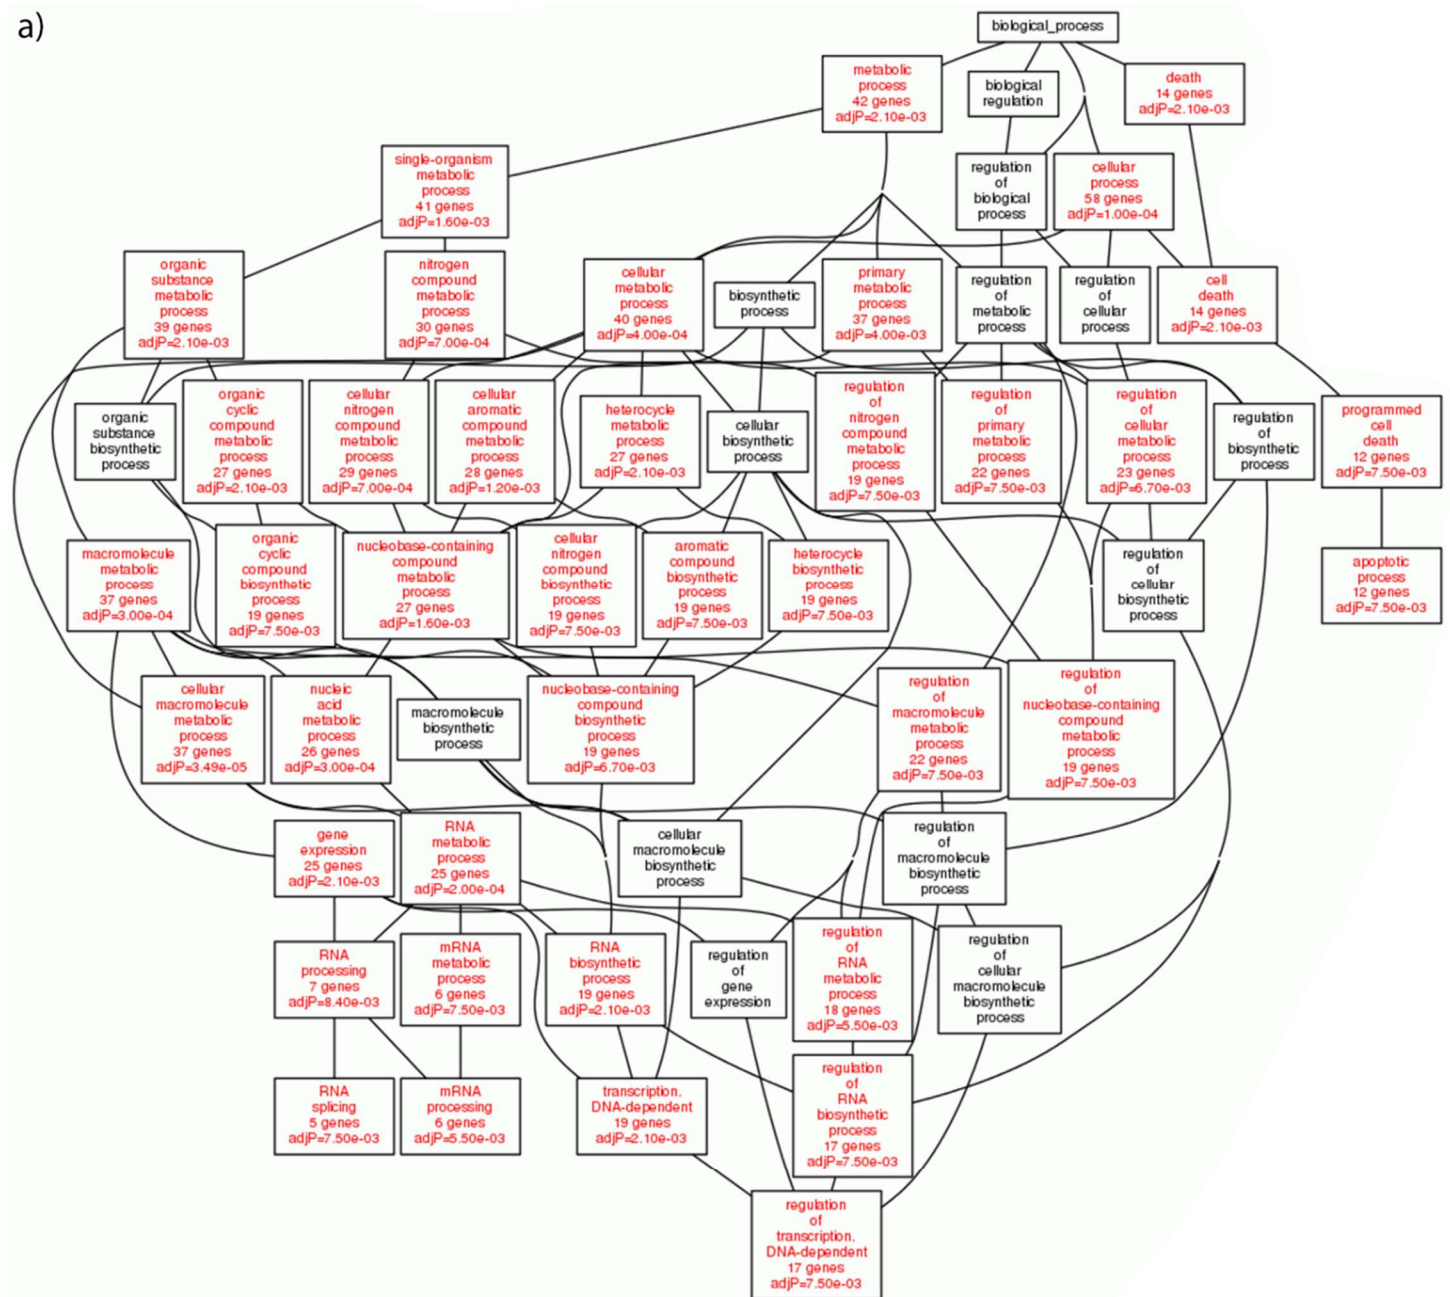

Supplement: s1 [file s1]
