# Supplementary material for: Peripubertal Nutritional Prevention of Cancer-Associated Gene Expression and Phenotypes
Source: MDPI journal article supplement (doi:10.3390/cancers15030674), 2023-01-21
Supplement: s1 [file s1]

# Mod TestDiet® AIN-93G w/26% Broccoli Sprout Seeds/Red

5AJU

## DESCRIPTION

Modification of TestDiet® AIN-93G with 26% broccoli sprout seeds and red dye.

Storage conditions are particularly critical to TestDiet® products, due to the absence of antioxidants or preservative agents. To provide maximum protection against possible changes during storage, store in a dry, cool location. Storage under refrigeration (2° C) is recommended. Maximum shelf life is six months. (If long term studies are involved, storing the diet at -20° C or colder may prolong shelf life.) Be certain to keep in air tight containers.

## Product Forms Available\* Catalog #

1/2" Pellet 1814479

## \*Other Forms Available On Re INGREDIENTS (%)

|                       |         |
|-----------------------|---------|
| Broccoli Sprout Seeds | 26.0000 |
| Casein - Vitamin Free | 20.0000 |
| Corn Starch           | 13.6986 |
| Maltodextrin          | 13.2000 |
| Sucrose               | 10.0000 |
| Soybean Oil           | 7.0000  |
| Powdered Cellulose    | 5.0000  |
| AIN 93G Mineral Mix   | 3.5000  |
| AIN 93 Vitamin Mix    | 1.0000  |
| L-Cystine             | 0.3000  |
| Choline Bitartrate    | 0.2500  |
| Red Dye               | 0.0500  |
| t-Butylhydroquinone   | 0.0014  |

## FEEDING DIRECTIONS

Feed ad libitum. Plenty of fresh, clean water should be available at all times.

## CAUTION:

Perishable - store properly upon receipt.  
For laboratory animal use only; NOT for human consumption.

9/8/2010

## NUTRITIONAL PROFILE <sup>1</sup>

|                                     |             |                               |       |
|-------------------------------------|-------------|-------------------------------|-------|
| <b>Protein, %</b>                   | <b>18.0</b> | <b>Minerals</b>               |       |
| Arginine, %                         | 0.70        | Calcium, %                    | 0.51  |
| Histidine, %                        | 0.52        | Phosphorus, %                 | 0.32  |
| Isoleucine, %                       | 0.96        | Phosphorus (available), %     | 0.16  |
| Leucine, %                          | 1.73        | Potassium, %                  | 0.36  |
| Lysine, %                           | 1.45        | Magnesium, %                  | 0.05  |
| Methionine, %                       | 0.52        | Sodium, %                     | 0.12  |
| Cystine, %                          | 0.37        | Chloride, %                   | 0.21  |
| Phenylalanine, %                    | 0.96        | Fluorine, ppm                 | 1.0   |
| Tyrosine, %                         | 1.01        | Iron, ppm                     | 38    |
| Threonine, %                        | 0.77        | Zinc, ppm                     | 35    |
| Tryptophan, %                       | 0.22        | Manganese, ppm                | 11    |
| Valine, %                           | 1.14        | Copper, ppm                   | 6.0   |
| Alanine, %                          | 0.55        | Cobalt, ppm                   | 0.0   |
| Aspartic Acid, %                    | 1.29        | Iodine, ppm                   | 0.21  |
| Glutamic Acid, %                    | 4.08        | Chromium, ppm                 | 1.0   |
| Glycine, %                          | 0.39        | Molybdenum, ppm               | 0.14  |
| Proline, %                          | 2.36        | Selenium, ppm                 | 0.24  |
| Serine, %                           | 1.10        |                               |       |
| Taurine, %                          | 0.00        | <b>Vitamins</b>               |       |
|                                     |             | Vitamin A, IU/g               | 4.0   |
| <b>Fat, %</b>                       | <b>7.0</b>  | Vitamin D-3 (added), IU/g     | 1.0   |
| Cholesterol, ppm                    | 0           | Vitamin E, IU/kg              | 81.6  |
| Linoleic Acid, %                    | 3.58        | Vitamin K (as menadione), ppm | 0.75  |
| Linolenic Acid, %                   | 0.55        | Thiamin Hydrochloride, ppm    | 6.1   |
| Arachidonic Acid, %                 | 0.00        | Riboflavin, ppm               | 6.7   |
| Omega-3 Fatty Acids, %              | 0.55        | Niacin, ppm                   | 30    |
| Total Saturated Fatty A             | 1.05        | Pantothenic Acid, ppm         | 16    |
| Total Monounsaturated               |             | Folic Acid, ppm               | 2.1   |
| Fatty Acids, %                      | 1.54        | Pyridoxine, ppm               | 5.8   |
| Polyunsaturated Fatty Acids, %      | 3.78        | Biotin, ppm                   | 0.2   |
|                                     |             | Vitamin B-12, mcg/kg          | 29    |
| <b>Fiber (max), %</b>               | <b>5.0</b>  | Choline Chloride, ppm         | 1,250 |
|                                     |             | Ascorbic Acid, ppm            | 0.0   |
| <b>Carbohydrates, %</b>             | <b>37.1</b> |                               |       |
| <b>Energy (kcal/g) <sup>2</sup></b> | <b>2.84</b> |                               |       |
| <b>From:</b>                        | <b>kcal</b> | <b>%</b>                      |       |
| Protein                             | 0.721       | 25.4                          |       |
| Fat (ether extract)                 | 0.632       | 22.3                          |       |
| Carbohydrates                       | 1.486       | 52.3                          |       |

1. Formulation based on calculated values from the latest ingredient analysis information. Since nutrient composition of natural ingredients varies and some nutrient loss will occur due to manufacturing processes, analysis will differ accordingly. Nutrients expressed as

1. Formulation based on calculated values from the latest ingredient analysis information. Since nutrient composition of natural ingredients varies and some nutrient loss will occur due to manufacturing processes, analysis will differ accordingly. Nutrients expressed as percent of ration on an As-Fed basis except where otherwise indicated.  
2. Energy (kcal/gm) - Sum of decimal fractions of protein, fat and carbohydrate x 4,9,4 kcal/gm respectively.

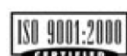

**TestDiet**  
www.testdiet.com

**Figure S1** Detailed dietary ingredients and nutritional profile of the customized broccoli sprout diet.
